# Supplementary material
Source: Research Square preprint supplement (doi:10.21203/rs.3.rs-8709332/v1)
Supplement: Supplementary file 1 [file 6f9cd7798cbc0ab38ae03e69.pdf]

1 **Supplementary Table S1. Patient and Clinical Phenotype Characteristics of the Study Cohorts.**

2

|                                                   | level  | Overall       | LIFE-Adult   | LIFE-Heart-Cases | LIFE-Heart-Controls | PROGRESS      |
|---------------------------------------------------|--------|---------------|--------------|------------------|---------------------|---------------|
| <b>n</b>                                          |        | 1306          | 400          | 126              | 400                 | 380           |
| <b>AGE (mean (SD))</b>                            |        | 61.06 (12.50) | 61.96 (9.22) | 64.49 (9.95)     | 61.97 (9.17)        | 58.00 (17.68) |
| <b>Plaque Score (mean (SD))</b>                   |        | 1.06 (1.27)   | 0.26 (0.53)  | 1.93 (1.32)      | 1.85 (1.29)         | NaN (NA)      |
| <b>SOFA Score (mean (SD))</b>                     |        | 3.64 (3.00)   | NaN (NA)     | NaN (NA)         | NaN (NA)            | 3.64 (3.00)   |
| <b>Inclusion (%)</b>                              | TRUE   | 1306 (100.0)  | 400 (100.0)  | 126 (100.0)      | 400 (100.0)         | 380 (100.0)   |
| <b>Day of Enrollment (%)</b>                      | 0      | 363 (27.8)    | 0 (0.0)      | 0 (0.0)          | 0 (0.0)             | 363 (95.5)    |
|                                                   | 1      | 13 (1.0)      | 0 (0.0)      | 0 (0.0)          | 0 (0.0)             | 13 (3.4)      |
|                                                   | 2      | 3 (0.2)       | 0 (0.0)      | 0 (0.0)          | 0 (0.0)             | 3 (0.8)       |
|                                                   | 3      | 1 (0.1)       | 0 (0.0)      | 0 (0.0)          | 0 (0.0)             | 1 (0.3)       |
|                                                   |        | 926 (70.9)    | 400 (100.0)  | 126 (100.0)      | 400 (100.0)         | 0 (0.0)       |
| <b>STROKE (%)</b>                                 | FALSE  | 795 (60.9)    | 399 (99.8)   | 4 (3.2)          | 392 (98.0)          | 0 (0.0)       |
|                                                   | TRUE   | 28 (2.1)      | 0 (0.0)      | 28 (22.2)        | 0 (0.0)             | 0 (0.0)       |
|                                                   | NA     | 483 (37)      | 1 (0.2)      | 94 (74.6)        | 8 (2.0)             | 380 (100.0)   |
| <b>Myocardial Infarction (%)</b>                  | FALSE  | 823 (63.0)    | 400 (100.0)  | 1 (0.8)          | 381 (95.2)          | 41 (10.8)     |
|                                                   | TRUE   | 76 (5.8)      | 0 (0.0)      | 76 (60.3)        | 0 (0.0)             | 0 (0.0)       |
|                                                   | NA     | 407 (31.2)    | 0 (0.0)      | 49 (38.9)        | 19 (4.8)            | 339 (89.2)    |
| <b>Cardiovascular Death (%)</b>                   | FALSE  | 493 (37.7)    | 0 (0.0)      | 93 (73.8)        | 400 (100.0)         | 0 (0.0)       |
|                                                   | TRUE   | 33 (2.5)      | 0 (0.0)      | 33 (26.2)        | 0 (0.0)             | 0 (0.0)       |
|                                                   | NA     | 780 (59.7)    | 400 (100.0)  | 0 (0.0)          | 0 (0.0)             | 380 (100.0)   |
| <b>Follow up with cardiovascular endpoint (%)</b> | FALSE  | 907 (69.4)    | 381 (95.2)   | 126 (100.0)      | 400 (100.0)         | 0 (0.0)       |
|                                                   | TRUE   | 19 (1.5)      | 19 (4.8)     | 0 (0.0)          | 0 (0.0)             | 0 (0.0)       |
|                                                   | NA     | 380 (29.1)    | 0 (0.0)      | 0 (0.0)          | 0 (0.0)             | 380 (100.0)   |
| <b>SEX (%)</b>                                    | FEMALE | 337 (25.8)    | 81 (20.2)    | 24 (19.0)        | 81 (20.2)           | 151 (39.7)    |
|                                                   | MALE   | 969 (74.2)    | 319 (79.8)   | 102 (81.0)       | 319 (79.8)          | 229 (60.3)    |
| <b>LMCAD (%)</b>                                  | FALSE  | 369 (28.3)    | 0 (0.0)      | 90 (71.4)        | 279 (69.8)          | 0 (0.0)       |
|                                                   | TRUE   | 157 (12.0)    | 0 (0.0)      | 36 (28.6)        | 121 (30.2)          | 0 (0.0)       |
|                                                   | NA     | 780 (59.7)    | 400 (100.0)  | 0 (0.0)          | 0 (0.0)             | 380 (100.0)   |
| <b>CAD (%)</b>                                    | TRUE   | 526 (40.3)    | 0 (0.0)      | 126 (100.0)      | 400 (100.0)         | 0 (0.0)       |
|                                                   | NA     | 780 (59.7)    | 400 (100.0)  | 0 (0.0)          | 0 (0.0)             | 380 (100.0)   |
| <b>CAD without prior MI (%)</b>                   | FALSE  | 39 (3.0)      | 0 (0.0)      | 0 (0.0)          | 0 (0.0)             | 39 (10.3)     |
|                                                   | NA     | 1267 (97.0)   | 400 (100.0)  | 126 (100.0)      | 400 (100.0)         | 341 (89.7)    |
| <b>Heart Failure (%)</b>                          | FALSE  | 366 (28.0)    | 0 (0.0)      | 0 (0.0)          | 0 (0.0)             | 366 (96.3)    |
|                                                   | NA     | 940 (72.0)    | 400 (100.0)  | 126 (100.0)      | 400 (100.0)         | 14 (3.7)      |

3

4 This table provides a summary of the baseline characteristics and clinical phenotypes for the three study cohorts: PROGRESS,  
5 LIFE-Adult, and LIFE-Heart. Data are presented as mean (standard deviation) for continuous variables and as number  
6 (percentage) for categorical variables.

7 Abbreviations: SOFA, Sequential Organ Failure Assessment; CAP, community-acquired pneumonia; CAD, coronary artery  
8 disease; NA, not applicable; LMCAD, Left Main Coronary Artery Stenosis; MI, Myocardial Infarction.

9

10 **Supplementary Table S2. LC-MS/MS parameter for sphingolipid quantification.**

11

| <b>Sphingolipid</b>             | <b>Precursor ion (<i>m/z</i>)</b>         | <b>Product ion (<i>m/z</i>)<sup>a</sup></b> | <b>ISTD</b>              | <b>Calibration reference compound</b> |
|---------------------------------|-------------------------------------------|---------------------------------------------|--------------------------|---------------------------------------|
| d <sub>7</sub> -Sph (ISTD)      | 307.3 [M+H] <sup>+</sup>                  | 289.3 / <b>259.3</b>                        | -                        | -                                     |
| d <sub>7</sub> -S1P (ISTD)      | 387.3 [M+H] <sup>+</sup>                  | <b>271.3</b> / 82.1                         | -                        | -                                     |
| Sph                             | 300.3 [M+H] <sup>+</sup>                  | 282.3 / <b>252.3</b>                        | d <sub>7</sub> -Sph      | -                                     |
| S1P                             | 380.3 [M+H] <sup>+</sup>                  | <b>264.3</b> / 82.1                         | d <sub>7</sub> -S1P      | -                                     |
| dhS1P                           | 382.3 [M+H] <sup>+</sup>                  | <b>284.3</b> / 266.4                        | d <sub>7</sub> -S1P      | -                                     |
| dhCer 16:0                      | 540.5 [M+H] <sup>+</sup>                  | 522.6 / <b>284.3</b>                        | Cer 17:0                 | dhCer 16:0                            |
| dhCer 18:0                      | 568.5 [M+H] <sup>+</sup>                  | 550.5 / <b>284.3</b>                        | Cer 17:0                 | dhCer 18:0                            |
| dhCer 20:0                      | 596.6 [M+H] <sup>+</sup>                  | 578.6 / <b>284.3</b>                        | Cer 17:0                 | dhCer 18:0                            |
| dhCer 22:0                      | 624.6 [M+H] <sup>+</sup>                  | 606.6 / <b>284.3</b>                        | Cer 17:0                 | dhCer 24:0                            |
| dhCer 24:0                      | 652.7 [M+H] <sup>+</sup>                  | 634.6 / <b>284.3</b>                        | Cer 17:0                 | dhCer 24:0                            |
| dhCer 24:1                      | 650.7 [M+H] <sup>+</sup>                  | 632.7 / <b>284.3</b>                        | Cer 17:0                 | dhCer 24:1                            |
| Cer 17:0 (ISTD)                 | 534.5 [M-H <sub>2</sub> O+H] <sup>+</sup> | 282.3 / <b>264.3</b>                        | -                        | -                                     |
| Cer 16:0                        | 520.5 [M-H <sub>2</sub> O+H] <sup>+</sup> | 282.3 / <b>264.3</b>                        | Cer 17:0                 | Cer 16:0                              |
| Cer 18:0                        | 548.5 [M-H <sub>2</sub> O+H] <sup>+</sup> | 282.3 / <b>264.2</b>                        | Cer 17:0                 | Cer 18:0                              |
| Cer 20:0                        | 576.6 [M-H <sub>2</sub> O+H] <sup>+</sup> | 282.3 / <b>264.3</b>                        | Cer 17:0                 | Cer 20:0                              |
| Cer 22:0                        | 604.6 [M-H <sub>2</sub> O+H] <sup>+</sup> | 282.3 / <b>264.3</b>                        | Cer 17:0                 | Cer 22:0                              |
| Cer 24:0                        | 632.6 [M-H <sub>2</sub> O+H] <sup>+</sup> | 282.3 / <b>264.3</b>                        | Cer 17:0                 | Cer 24:0                              |
| Cer 24:1                        | 630.6 [M-H <sub>2</sub> O+H] <sup>+</sup> | 282.3 / <b>264.3</b>                        | Cer 17:0                 | Cer 24:1                              |
| dhSM 16:0                       | 705.6 [M+H] <sup>+</sup>                  | <b>184.0</b> / 86.1                         | d <sub>31</sub> -SM 16:0 | SM 16:0                               |
| dhSM 18:0                       | 733.6 [M+H] <sup>+</sup>                  | <b>184.0</b> / 86.1                         | d <sub>31</sub> -SM 16:0 | SM 18:0                               |
| dhSM 20:0                       | 761.6 [M+H] <sup>+</sup>                  | <b>184.0</b> / 86.1                         | d <sub>31</sub> -SM 16:0 | SM 20:0                               |
| dhSM 22:0                       | 789.7 [M+H] <sup>+</sup>                  | <b>184.0</b> / 86.1                         | d <sub>31</sub> -SM 16:0 | SM 22:0                               |
| dhSM 24:0                       | 817.7 [M+H] <sup>+</sup>                  | <b>184.0</b> / 86.1                         | d <sub>31</sub> -SM 16:0 | SM 24:0                               |
| dhSM 24:1                       | 815.7 [M+H] <sup>+</sup>                  | 184.0 / <b>86.1</b>                         | d <sub>31</sub> -SM 16:0 | SM 24:1                               |
| d <sub>31</sub> -SM 16:0 (ISTD) | 734.6 [M+H] <sup>+</sup>                  | <b>184.0</b> / 86.1                         | -                        | -                                     |
| SM 14:0                         | 675.5 [M+H] <sup>+</sup>                  | <b>184.0</b> / 86.1                         | d <sub>31</sub> -SM 16:0 | SM 18:0                               |
| SM 16:0                         | 703.6 [M+H] <sup>+</sup>                  | <b>184.0</b> / 86.1                         | d <sub>31</sub> -SM 16:0 | SM 16:0                               |
| SM 18:0                         | 731.6 [M+H] <sup>+</sup>                  | <b>184.0</b> / 86.1                         | d <sub>31</sub> -SM 16:0 | SM 18:0                               |
| SM 20:0                         | 759.6 [M+H] <sup>+</sup>                  | <b>184.0</b> / 86.1                         | d <sub>31</sub> -SM 16:0 | SM 20:0                               |
| SM 22:0                         | 787.7 [M+H] <sup>+</sup>                  | <b>184.0</b> / 86.1                         | d <sub>31</sub> -SM 16:0 | SM 22:0                               |
| SM 24:0                         | 815.7 [M+H] <sup>+</sup>                  | <b>184.0</b> / 86.1                         | d <sub>31</sub> -SM 16:0 | SM 24:0                               |
| SM 24:1                         | 813.7 [M+H] <sup>+</sup>                  | 184.0 / <b>86.1</b>                         | d <sub>31</sub> -SM 16:0 | SM 24:1                               |
| HexCer 17:0 (ISTD)              | 714.6 [M+H] <sup>+</sup>                  | 696.6 / <b>264.2</b>                        | -                        | -                                     |
| HexCer 16:0                     | 700.6 [M+H] <sup>+</sup>                  | 682.6 / <b>264.2</b>                        | HexCer 17:0              | HexCer 16:0                           |
| HexCer 18:0                     | 728.6 [M+H] <sup>+</sup>                  | 710.6 / <b>264.2</b>                        | HexCer 17:0              | HexCer 16:0                           |
| HexCer 20:0                     | 756.6 [M+H] <sup>+</sup>                  | 738.6 / <b>264.2</b>                        | HexCer 17:0              | HexCer 16:0                           |
| HexCer 22:0                     | 784.6 [M+H] <sup>+</sup>                  | 766.6 / <b>264.2</b>                        | HexCer 17:0              | HexCer 24:1                           |
| HexCer 24:0                     | 812.7 [M+H] <sup>+</sup>                  | 794.7 / <b>264.2</b>                        | HexCer 17:0              | HexCer 24:1                           |
| HexCer 24:1                     | 810.7 [M+H] <sup>+</sup>                  | 792.7 / <b>264.2</b>                        | HexCer 17:0              | HexCer 24:1                           |
| LacCer 17:0 (ISTD)              | 876.6 [M+H] <sup>+</sup>                  | 534.5 / <b>264.3</b>                        | -                        | -                                     |
| LacCer 16:0                     | 862.6 [M+H] <sup>+</sup>                  | 520.5 / <b>264.3</b>                        | LacCer 17:0              | LacCer 16:0                           |
| LacCer 18:0                     | 890.6 [M+H] <sup>+</sup>                  | 548.5 / <b>264.3</b>                        | LacCer 17:0              | LacCer 16:0                           |
| LacCer 20:0                     | 918.6 [M+H] <sup>+</sup>                  | 576.6 / <b>264.3</b>                        | LacCer 17:0              | LacCer 16:0                           |
| LacCer 22:0                     | 946.6 [M+H] <sup>+</sup>                  | 604.6 / <b>264.3</b>                        | LacCer 17:0              | LacCer 24:1                           |
| LacCer 24:0                     | 974.7 [M+H] <sup>+</sup>                  | 632.6 / <b>264.3</b>                        | LacCer 17:0              | LacCer 24:1                           |
| LacCer 24:1                     | 972.7 [M+H] <sup>+</sup>                  | 630.7 / <b>264.3</b>                        | LacCer 17:0              | LacCer 24:1                           |

12 Precursor ion (*m/z*) represents the mass-to-charge ratio of the intact ion selected in the first quadrupole (Q1). Product ion  
13 (*m/z*) denotes the fragment ions generated via collision-induced dissociation and selected in the third quadrupole (Q3); bold  
14 values indicate the quantifier ion used for calculation. Calibration reference compound refers to the specific standard used  
15 to construct the calibration curve for quantification.

16 Abbreviations: Cer, ceramide; dhCer, dihydroceramide; dhS1P, dihydrosphingosine 1-phosphate, dhSM,  
17 dihydrosphingomyelin; HexCer, hexosylceramide; ISTD, internal standard; LacCer, lactosylceramide; S1P, sphingosine 1-  
18 phosphate; SM, sphingomyelin; Sph, sphingosine.

19 **Supplementary Figure S1. Data quality control and preprocessing.**

20 (A) Principal component analysis (PCA) of the raw metabolomics data, with samples colored by analytical batch. The distinct  
21 clustering of batches (e.g., B1-B7) indicates a strong batch effect. Notably, the PROGRESS samples, analyzed in batch 5 (B5P),  
22 form a separate cluster. (B) PCA of the data after batch correction using the EigenMS algorithm. The successful removal of  
23 batch-associated variation is demonstrated by the intermingling of samples from all batches. The B5P samples are now  
24 integrated with the other patient samples according to their biological group rather than their analytical batch. (C) PCA of the  
25 raw data colored by primary analysis group. While some underlying biological structure is visible, it is partially obscured by  
26 technical variation. (D) PCA of the final, fully preprocessed data set. After batch correction and normalization, the primary  
27 biological groups (e.g., PROGRESS vs. other groups) show clear separation, indicating that the data is ready for downstream  
28 statistical analysis.

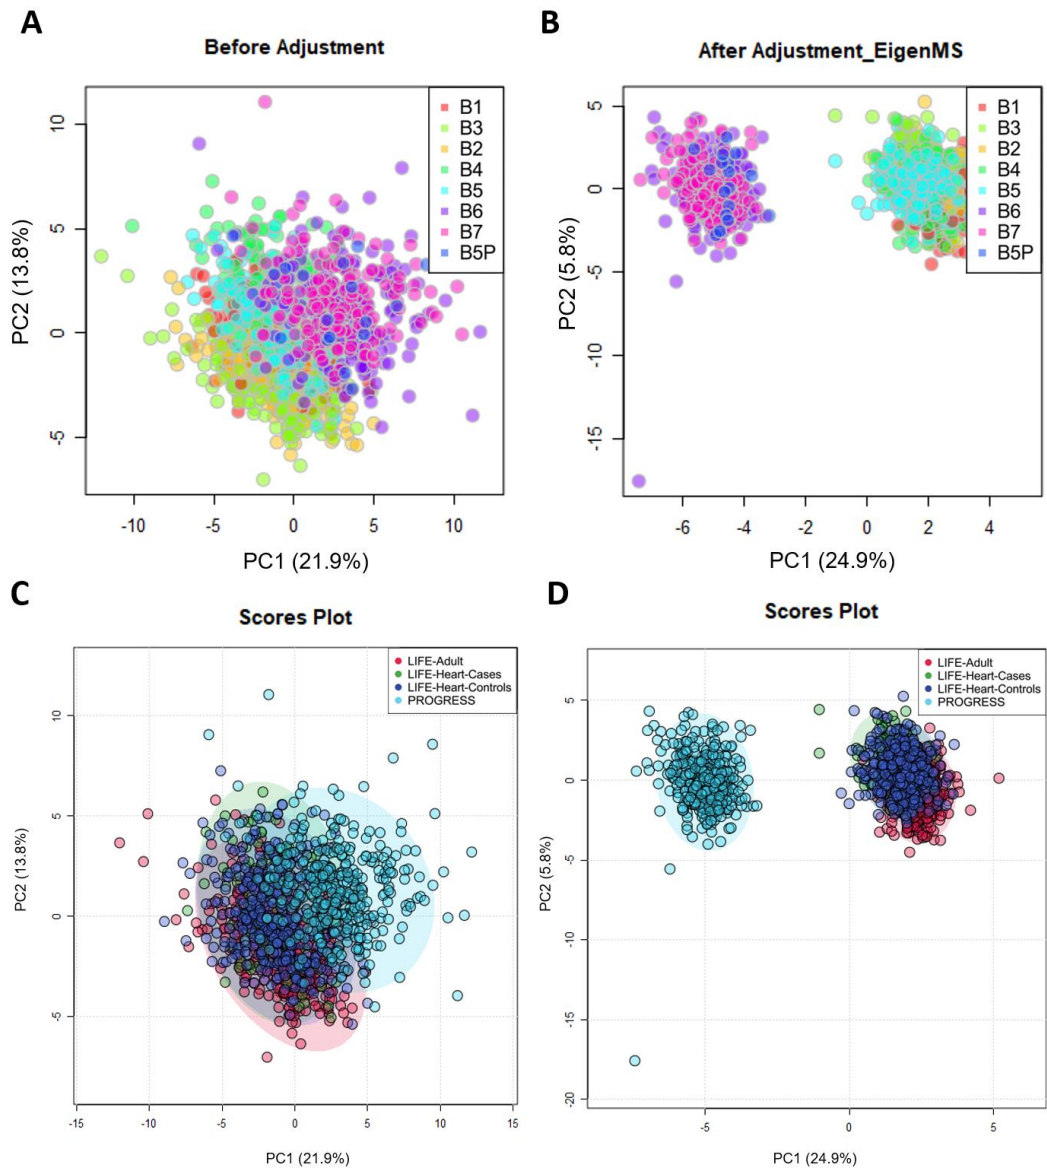

30 **Supplementary Table S3. Differential abundance of all 43 metabolites between the PROGRESS and LIFE-Adult groups.**

| Metabolite     | Log <sub>2</sub> Fold Change (log <sub>2</sub> FC) | Q-value                 |
|----------------|----------------------------------------------------|-------------------------|
| dhCer 24:0     | -2.01                                              | $1.00 \times 10^{-179}$ |
| dhS1P          | 1.99                                               | $5.30 \times 10^{-156}$ |
| S1P            | 1.94                                               | $9.50 \times 10^{-172}$ |
| Cer 18:0       | 1.86                                               | $3.60 \times 10^{-162}$ |
| Cer 16:0       | 1.86                                               | $4.60 \times 10^{-159}$ |
| Cer 24:0       | -1.84                                              | $3.70 \times 10^{-132}$ |
| dhCer (total)  | -1.83                                              | $7.10 \times 10^{-164}$ |
| Cer 20:0       | 1.76                                               | $5.60 \times 10^{-137}$ |
| SM 18:0        | 1.62                                               | $8.62 \times 10^{-97}$  |
| dhCer 22:0     | -1.61                                              | $2.00 \times 10^{-117}$ |
| HexCer 22:0    | -1.49                                              | $3.47 \times 10^{-75}$  |
| LacCer 18:0    | 1.36                                               | $1.31 \times 10^{-62}$  |
| LacCer (total) | 1.34                                               | $2.74 \times 10^{-76}$  |
| SM 14:0        | -1.30                                              | $3.48 \times 10^{-54}$  |
| dhSM 22:0      | -1.28                                              | $6.91 \times 10^{-74}$  |
| dhSM 20:0      | -1.24                                              | $8.19 \times 10^{-74}$  |
| dhCer 24:1     | -1.23                                              | $7.09 \times 10^{-68}$  |
| SM 24:0        | -1.10                                              | $9.61 \times 10^{-43}$  |
| SM 20:0        | -1.09                                              | $3.81 \times 10^{-42}$  |
| dhCer 18:0     | 1.06                                               | $1.16 \times 10^{-35}$  |
| LacCer 16:0    | 0.96                                               | $2.19 \times 10^{-39}$  |
| Sph            | 0.95                                               | $8.41 \times 10^{-26}$  |
| HexCer 18:0    | 0.85                                               | $9.15 \times 10^{-29}$  |
| Cer 24:1       | 0.81                                               | $1.60 \times 10^{-23}$  |
| HexCer 16:0    | 0.76                                               | $2.06 \times 10^{-20}$  |
| dhSM 18:0      | 0.75                                               | $5.31 \times 10^{-20}$  |
| dhSM 24:0      | -0.71                                              | $2.02 \times 10^{-17}$  |
| dhSM (total)   | -0.70                                              | $1.53 \times 10^{-21}$  |
| HexCer 24:0    | -0.67                                              | $2.74 \times 10^{-18}$  |
| dhSM 24:1      | -0.66                                              | $1.95 \times 10^{-17}$  |
| dhSM 16:0      | -0.65                                              | $2.42 \times 10^{-17}$  |
| HexCer 20:0    | -0.52                                              | $5.36 \times 10^{-10}$  |
| dhCer 16:0     | 0.51                                               | $6.28 \times 10^{-10}$  |
| LacCer 24:1    | 0.49                                               | $8.15 \times 10^{-10}$  |
| LacCer 20:0    | 0.41                                               | $1.53 \times 10^{-6}$   |
| HexCer (total) | -0.35                                              | $1.20 \times 10^{-5}$   |
| LacCer 22:0    | -0.28                                              | $3.21 \times 10^{-4}$   |
| dhCer 20:0     | -0.25                                              | $8.25 \times 10^{-3}$   |
| HexCer 24:1    | 0.24                                               | $5.77 \times 10^{-3}$   |
| SM 22:0        | -0.21                                              | $1.34 \times 10^{-2}$   |
| Cer 22:0       | 0.14                                               | $9.65 \times 10^{-2}$   |
| LacCer 24:0    | -0.01                                              | $8.78 \times 10^{-1}$   |
| Cer (total)    | 0.00                                               | $9.65 \times 10^{-1}$   |

31

32 Metabolites (individual or subclass total) with  $|\log_2\text{FC}| > 0.5$  and q-value  $< 0.05$  were considered significant. Results are  
33 ordered by the strength of association (highest to lowest absolute fold change). A positive log<sub>2</sub> fold change denotes increased  
34 abundance in the PROGRESS group relative to the LIFE-Adult group. Abbreviations: Cer, Ceramide; dhCer, Dihydroceramide;  
35 dhS1P, Dihydrosphingosine 1-phosphate; dhSM, Dihydrosphingomyelin, HexCer, Hexosylceramide; LacCer, Lactosylceramide;  
36 S1P, Sphingosine-1-phosphate; SM, Sphingomyelin; Sph, Sphingosine.

37 **Supplementary Figure S2. Pathway Enrichment Analysis of 33-Pneumonia Associated Metabolites**

38 This figure displays the results of the pathway over-representation analysis performed on the 33 metabolites found to be  
 39 significantly different in pneumonia patients, showing the top 25 most enriched metabolite sets. The y-axis lists the names  
 40 of the enriched biological pathways, while the x-axis represents the statistical significance of the enrichment, plotted as the  
 41  $-\log_{10}$  of the p-value, where a higher value indicates greater significance. The visual characteristics of each point provide  
 42 further detail: its size is proportional to the Enrichment Ratio, with larger points indicating a higher ratio of observed to  
 43 expected metabolites within that pathway, and its color corresponds to the p-value, with deep red indicating the highest  
 44 significance. As expected, given that all 33 input metabolites are sphingolipids, the analysis confirmed that pathways related  
 45 to sphingolipid metabolism were the most prominently and significantly enriched. Several lysosomal storage disorders  
 46 associated with sphingolipid breakdown, such as Fabry, Gaucher, and Krabbe disease, are also among the top hits.

47

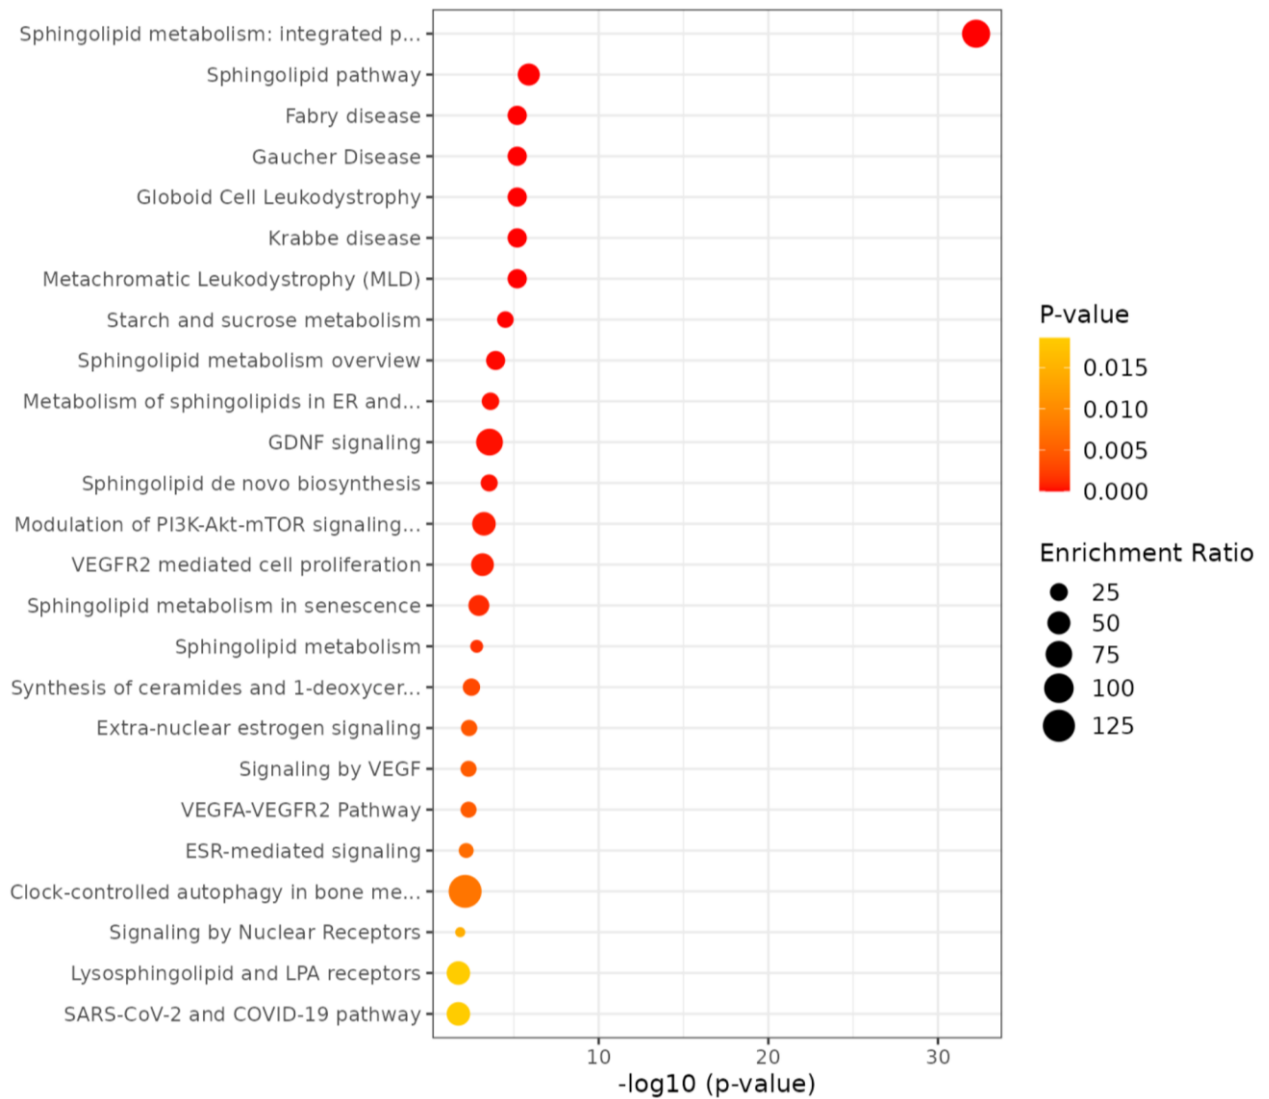

48

49 **Supplementary Figure S3. Concordance of 33 Pneumonia Associated Metabolites with Disease Severity**

50 Heatmap displaying the relationship between pneumonia status and disease severity for 33 pneumonia-associated  
 51 metabolites. The left column shows the log2fold change (log2FC) in pneumonia vs. controls, while the right column shows  
 52 the association coefficient with the SOFA score at baseline. To allow direct comparison between these distinct metrics, values  
 53 were column-scaled (Z-score): red indicates upregulation in pneumonia or a positive association with higher SOFA scores,  
 54 while blue indicates downregulation or a negative association. Rows are organized by hierarchical clustering using a sign-  
 55 symmetric distance measure (1-|r|), where  $r$  is the partial Pearson correlation coefficient adjusted for age, sex, diabetes  
 56 status, eGFR, and study group. Asterisks (\*) denote statistical significance, defined as:  $q < 0.05$  &  $|\log_2FC| > 0.5$  for the  
 57 Pneumonia contrast; and  $q < 0.25$  for the association with SOFA score. The red annotation bar ('Concordance') highlights  
 58 metabolites showing a significant and directionally concordant effect in both analyses.

59

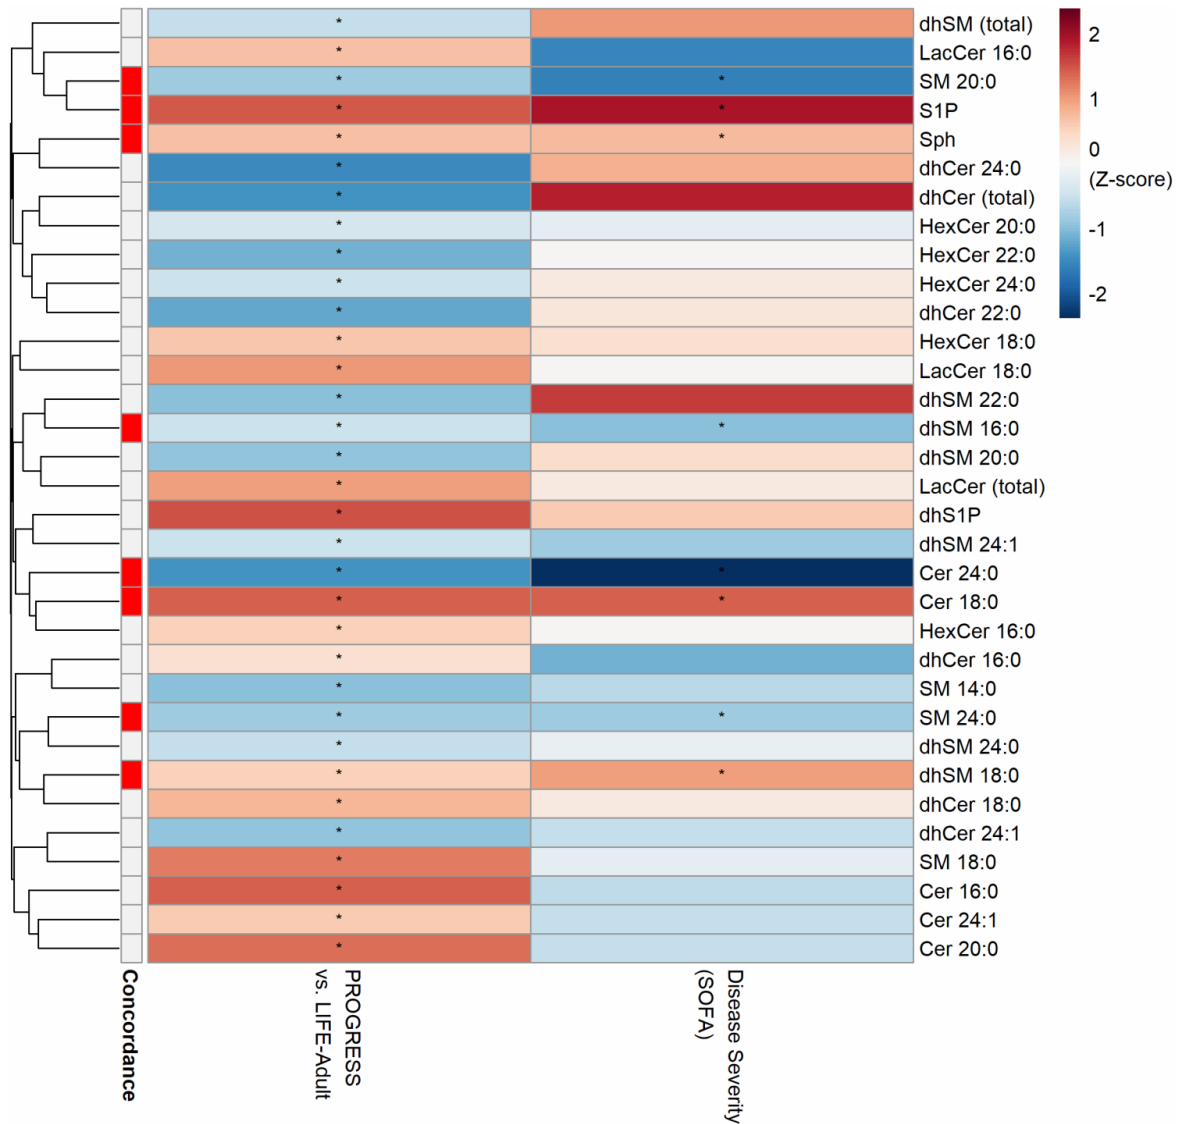

60

61 **Supplementary Table S4. Association of Pneumonia-Associated Metabolites with Disease Severity.**

62

| <b>Metabolite</b> | <b>Estimate (<math>\beta</math>)</b> | <b>Q-value</b> |
|-------------------|--------------------------------------|----------------|
| Cer 24:0          | -0.65                                | 0.004          |
| SM 20:0           | -0.43                                | 0.008          |
| S1P               | 0.60                                 | 0.010          |
| LacCer 16:0       | -0.42                                | 0.035          |
| dhSM 22:0         | 0.51                                 | 0.043          |
| dhCer 16:0        | -0.29                                | 0.058          |
| Cer 18:0          | 0.44                                 | 0.106          |
| dhCer (total)     | 0.56                                 | 0.106          |
| dhSM (total)      | 0.33                                 | 0.106          |
| dhSM 18:0         | 0.32                                 | 0.111          |
| Sph               | 0.25                                 | 0.158          |
| dhSM 16:0         | -0.24                                | 0.243          |
| SM 24:0           | -0.21                                | 0.248          |
| dhS1P             | 0.21                                 | 0.395          |
| dhSM 24:1         | -0.21                                | 0.395          |
| SM 14:0           | -0.15                                | 0.431          |
| HexCer 18:0       | 0.14                                 | 0.520          |
| dhCer 24:0        | 0.28                                 | 0.578          |
| dhCer 18:0        | 0.10                                 | 0.597          |
| Cer 24:1          | -0.12                                | 0.597          |
| dhSM 20:0         | 0.15                                 | 0.597          |
| Cer 20:0          | -0.13                                | 0.638          |
| Cer 16:0          | -0.13                                | 0.638          |
| LacCer (total)    | 0.10                                 | 0.650          |
| dhCer 24:1        | -0.12                                | 0.677          |
| HexCer 24:0       | 0.10                                 | 0.677          |
| dhCer 22:0        | 0.11                                 | 0.790          |
| HexCer 16:0       | 0.04                                 | 0.847          |
| LacCer 18:0       | 0.04                                 | 0.864          |
| HexCer 22:0       | 0.04                                 | 0.889          |
| SM 18:0           | -0.03                                | 0.896          |
| HexCer 20:0       | -0.02                                | 0.906          |
| dhSM 24:0         | -0.01                                | 0.919          |

63

64 The table presents association results for the 33 pneumonia associated metabolites with disease severity operationalized by  
65 the SOFA score. Results were derived from multivariable linear regression models, adjusted for age, sex, eGFR, and diabetes  
66 status. A positive  $\beta$ -estimate indicates that higher metabolite levels are associated with a higher SOFA score. The table is  
67 ordered by the absolute  $\beta$ -estimate in descending order. Significance was determined using a Benjamini-Hochberg false  
68 discovery rate (FDR) threshold of  $q < 0.25$ .

69 Abbreviations: Cer, Ceramide; dhCer, Dihydroceramide; dhS1P, Dihydrosphingosine 1-phosphate; dhSM,  
70 Dihydrosphingomyelin, HexCer, Hexosylceramide; LacCer, Lactosylceramide; S1P, Sphingosine 1-phosphate; SM,  
71 Sphingomyelin; Sph, Sphingosine.

72 **Supplementary Figure S4. Volcano plot for the differential abundance of the 33-metabolite pneumonia**  
73 **signature between stable CAD and healthy controls.**

74 Each point represents one of the 33 metabolites from the pneumonia associated signature. The x-axis shows the  $\log_2$  fold  
75 change, and the y-axis shows the  $-\log_{10}$  of the Benjamini-Hochberg adjusted p-value (q-value). Metabolites meeting the  
76 significance threshold ( $q < 0.05$ ) are highlighted, with red indicating upregulation and blue indicating downregulation in the  
77 LIFE-Heart controls group (stable CAD). The horizontal dashed line represents the significance threshold. The top 10 most  
78 significant metabolites are labeled.

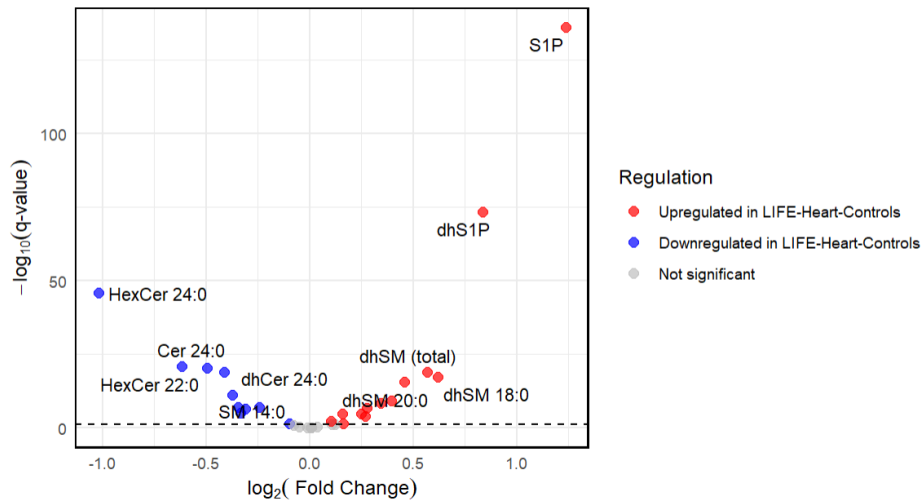

80 **Supplementary Table S5. Differential abundance of the 33-metabolite pneumonia signature between the**  
81 **LIFE-Heart-Controls and LIFE-Adult groups.**

82

| Metabolite     | Log <sub>2</sub> Fold Change (log <sub>2</sub> FC) | Q-value                   |
|----------------|----------------------------------------------------|---------------------------|
| S1P            | 1.24                                               | 6.10 × 10 <sup>-137</sup> |
| HexCer 24:0    | -1.02                                              | 1.12 × 10 <sup>-46</sup>  |
| dhS1P          | 0.84                                               | 4.61 × 10 <sup>-74</sup>  |
| dhSM 18:0      | 0.62                                               | 5.52 × 10 <sup>-18</sup>  |
| HexCer 22:0    | -0.62                                              | 1.26 × 10 <sup>-21</sup>  |
| dhSM (total)   | 0.57                                               | 9.28 × 10 <sup>-20</sup>  |
| Cer 24:0       | -0.49                                              | 3.66 × 10 <sup>-21</sup>  |
| dhSM 20:0      | 0.46                                               | 2.68 × 10 <sup>-16</sup>  |
| dhCer 24:0     | -0.41                                              | 1.07 × 10 <sup>-19</sup>  |
| dhCer 16:0     | 0.39                                               | 6.61 × 10 <sup>-10</sup>  |
| SM 14:0        | -0.37                                              | 5.32 × 10 <sup>-12</sup>  |
| Cer 24:1       | -0.35                                              | 1.07 × 10 <sup>-7</sup>   |
| dhCer 18:0     | 0.34                                               | 5.20 × 10 <sup>-9</sup>   |
| HexCer 20:0    | -0.33                                              | 8.54 × 10 <sup>-6</sup>   |
| LacCer 16:0    | -0.31                                              | 2.68 × 10 <sup>-7</sup>   |
| SM 18:0        | 0.28                                               | 1.94 × 10 <sup>-7</sup>   |
| dhSM 24:1      | 0.27                                               | 8.21 × 10 <sup>-5</sup>   |
| dhSM 22:0      | 0.25                                               | 1.19 × 10 <sup>-5</sup>   |
| LacCer (total) | -0.24                                              | 1.16 × 10 <sup>-7</sup>   |
| dhSM 24:0      | 0.16                                               | 2.72 × 10 <sup>-2</sup>   |
| Cer 18:0       | 0.16                                               | 2.06 × 10 <sup>-5</sup>   |
| Sph            | 0.12                                               | 8.48 × 10 <sup>-2</sup>   |
| dhCer 24:1     | 0.10                                               | 9.02 × 10 <sup>-2</sup>   |
| Cer 16:0       | 0.10                                               | 4.37 × 10 <sup>-3</sup>   |
| dhCer (total)  | -0.10                                              | 3.96 × 10 <sup>-2</sup>   |
| dhCer 22:0     | -0.08                                              | 1.72 × 10 <sup>-1</sup>   |
| HexCer 18:0    | -0.05                                              | 4.65 × 10 <sup>-1</sup>   |
| SM 20:0        | 0.04                                               | 6.08 × 10 <sup>-1</sup>   |
| dhSM 16:0      | -0.01                                              | 9.42 × 10 <sup>-1</sup>   |
| LacCer 18:0    | 0.01                                               | 9.42 × 10 <sup>-1</sup>   |
| HexCer 16:0    | 0.01                                               | 9.42 × 10 <sup>-1</sup>   |
| SM 24:0        | 0.00                                               | 9.42 × 10 <sup>-1</sup>   |
| Cer 20:0       | 0.00                                               | 9.42 × 10 <sup>-1</sup>   |

83

84 We analyzed the 33 pneumonia associated metabolites for association with stable CAD case/control status. Significance in  
85 this analysis was defined as q-value < 0.05. The results are ordered by decreasing absolute fold change. A positive log<sub>2</sub> fold  
86 change denotes increased abundance in the stable CAD group (LIFE-Heart controls).

87 Abbreviations: Cer, Ceramide; dhCer, Dihydroceramide; dhS1P, Dihydrosphingosine 1-phosphate; dhSM,  
88 Dihydrosphingomyelin, HexCer, Hexosylceramide; LacCer, Lactosylceramide; S1P, Sphingosine 1-phosphate; SM,  
89 Sphingomyelin; Sph, Sphingosine.

90 **Supplementary Figure S5. Volcano plot for the differential abundance of pneumonia associated metabolites**  
91 **between stable and unstable CAD.**

92 Each point represents one of the 33 metabolites associated with pneumonia case/control status. The x-axis shows the  $\log_2$   
93 fold change, and the y-axis shows the  $-\log_{10}$  of the Benjamini-Hochberg adjusted p-value (q-value). Metabolites meeting the  
94 significance threshold ( $q < 0.05$ ) are highlighted, with red indicating upregulation and blue indicating downregulation in the  
95 unstable CAD group (LIFE-Heart cases). The horizontal dashed line represents the significance threshold. The top 10 most  
96 significant metabolites are labeled.

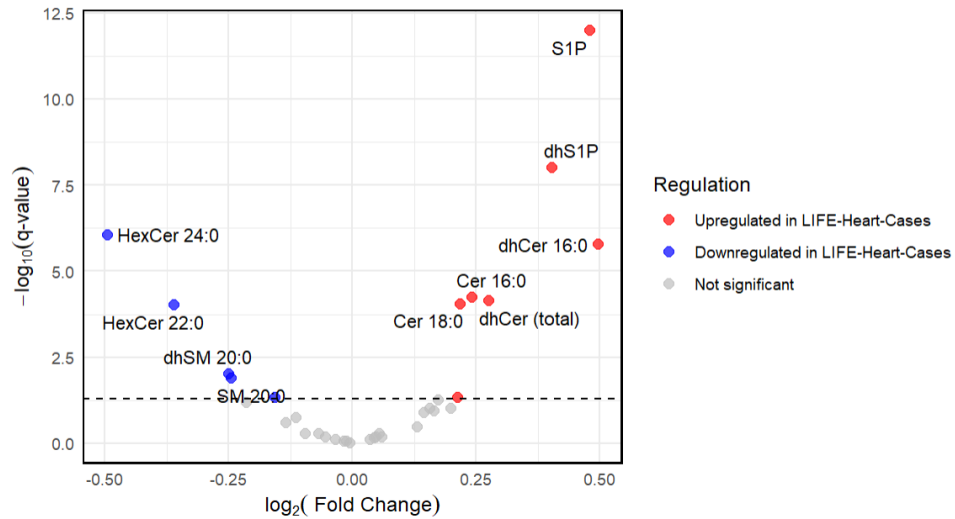

98 **Supplementary Table S6. Differential abundance of pneumonia associated metabolites between stable and**  
 99 **unstable CAD.**

100

| Metabolite     | Log <sub>2</sub> Fold Change (log <sub>2</sub> FC) | Q-value                  |
|----------------|----------------------------------------------------|--------------------------|
| dhCer 16:0     | 0.50                                               | 1.61 × 10 <sup>-6</sup>  |
| HexCer 24:0    | -0.49                                              | 8.53 × 10 <sup>-7</sup>  |
| S1P            | 0.48                                               | 9.95 × 10 <sup>-13</sup> |
| dhS1P          | 0.40                                               | 9.58 × 10 <sup>-9</sup>  |
| HexCer 22:0    | -0.36                                              | 9.36 × 10 <sup>-5</sup>  |
| dhCer (total)  | 0.28                                               | 7.04 × 10 <sup>-5</sup>  |
| dhSM 20:0      | -0.25                                              | 9.22 × 10 <sup>-3</sup>  |
| SM 20:0        | -0.25                                              | 1.27 × 10 <sup>-2</sup>  |
| Cer 16:0       | 0.24                                               | 5.57 × 10 <sup>-5</sup>  |
| Cer 18:0       | 0.22                                               | 8.55 × 10 <sup>-5</sup>  |
| dhSM 24:1      | -0.21                                              | 6.46 × 10 <sup>-2</sup>  |
| dhCer 24:1     | 0.21                                               | 4.57 × 10 <sup>-2</sup>  |
| dhSM 18:0      | 0.20                                               | 9.59 × 10 <sup>-2</sup>  |
| SM 18:0        | 0.17                                               | 5.33 × 10 <sup>-2</sup>  |
| dhCer 18:0     | 0.16                                               | 1.10 × 10 <sup>-1</sup>  |
| LacCer (total) | -0.16                                              | 4.57 × 10 <sup>-2</sup>  |
| SM 24:0        | 0.16                                               | 9.59 × 10 <sup>-2</sup>  |
| dhCer 22:0     | 0.14                                               | 1.23 × 10 <sup>-1</sup>  |
| HexCer 16:0    | -0.13                                              | 2.51 × 10 <sup>-1</sup>  |
| dhSM 16:0      | 0.13                                               | 3.29 × 10 <sup>-1</sup>  |
| LacCer 18:0    | -0.11                                              | 1.79 × 10 <sup>-1</sup>  |
| HexCer 20:0    | -0.10                                              | 4.97 × 10 <sup>-1</sup>  |
| Cer 24:0       | -0.07                                              | 4.97 × 10 <sup>-1</sup>  |
| Cer 24:1       | 0.06                                               | 6.43 × 10 <sup>-1</sup>  |
| dhCer 24:0     | 0.05                                               | 4.97 × 10 <sup>-1</sup>  |
| LacCer 16:0    | -0.05                                              | 6.43 × 10 <sup>-1</sup>  |
| Sph            | 0.05                                               | 6.43 × 10 <sup>-1</sup>  |
| SM 14:0        | 0.04                                               | 6.83 × 10 <sup>-1</sup>  |
| HexCer 18:0    | 0.04                                               | 7.52 × 10 <sup>-1</sup>  |
| dhSM 22:0      | -0.03                                              | 7.52 × 10 <sup>-1</sup>  |
| dhSM (total)   | -0.02                                              | 8.66 × 10 <sup>-1</sup>  |
| Cer 20:0       | -0.01                                              | 8.66 × 10 <sup>-1</sup>  |
| dhSM 24:0      | -0.01                                              | 9.55 × 10 <sup>-1</sup>  |

101

102 We compared the 33 metabolites associates with pneumonia case/control status between stable and unstable CAD casese.  
 103 Significance in this analysis was defined as q-value < 0.05. The results are ordered by decreasing absolute fold change. A  
 104 positive log<sub>2</sub> fold change denotes increased abundance in unstable CAD cases (LIFE-Heart cases).

105 Abbreviations: Cer, Ceramide; dhCer, Dihydroceramide; dhS1P, Dihydrosphingosine 1-phosphate; dhSM,  
 106 Dihydrosphingomyelin, HexCer, Hexosylceramide; LacCer, Lactosylceramide; S1P, Sphingosine 1-phosphate; SM,  
 107 Sphingomyelin; Sph, Sphingosine.

108 **Supplementary Figure S6. Confounder-Adjusted Correlation Matrix of all 43 Measured Metabolites.**

109 This heatmap displays the Spearman correlation coefficients among all 43 metabolites included in the study. To account for  
 110 potential confounding variables, correlations were calculated on the residuals from linear models adjusted for cohort (Class),  
 111 age, sex, eGFR, and diabetes. Red squares indicate a positive correlation and blue squares indicate a negative correlation,  
 112 with color intensity proportional to the strength of the association. Numerical values are shown only for correlations that  
 113 were statistically significant ( $p < 0.05$ ). Metabolite labels are colored to indicate their classification from the multi-stage  
 114 analysis. Labels in red denote the 17 metabolites, which were significant in the pneumonia case/control analysis and also  
 115 dysregulated with a concordant direction of change in at least one cardiovascular disease context.

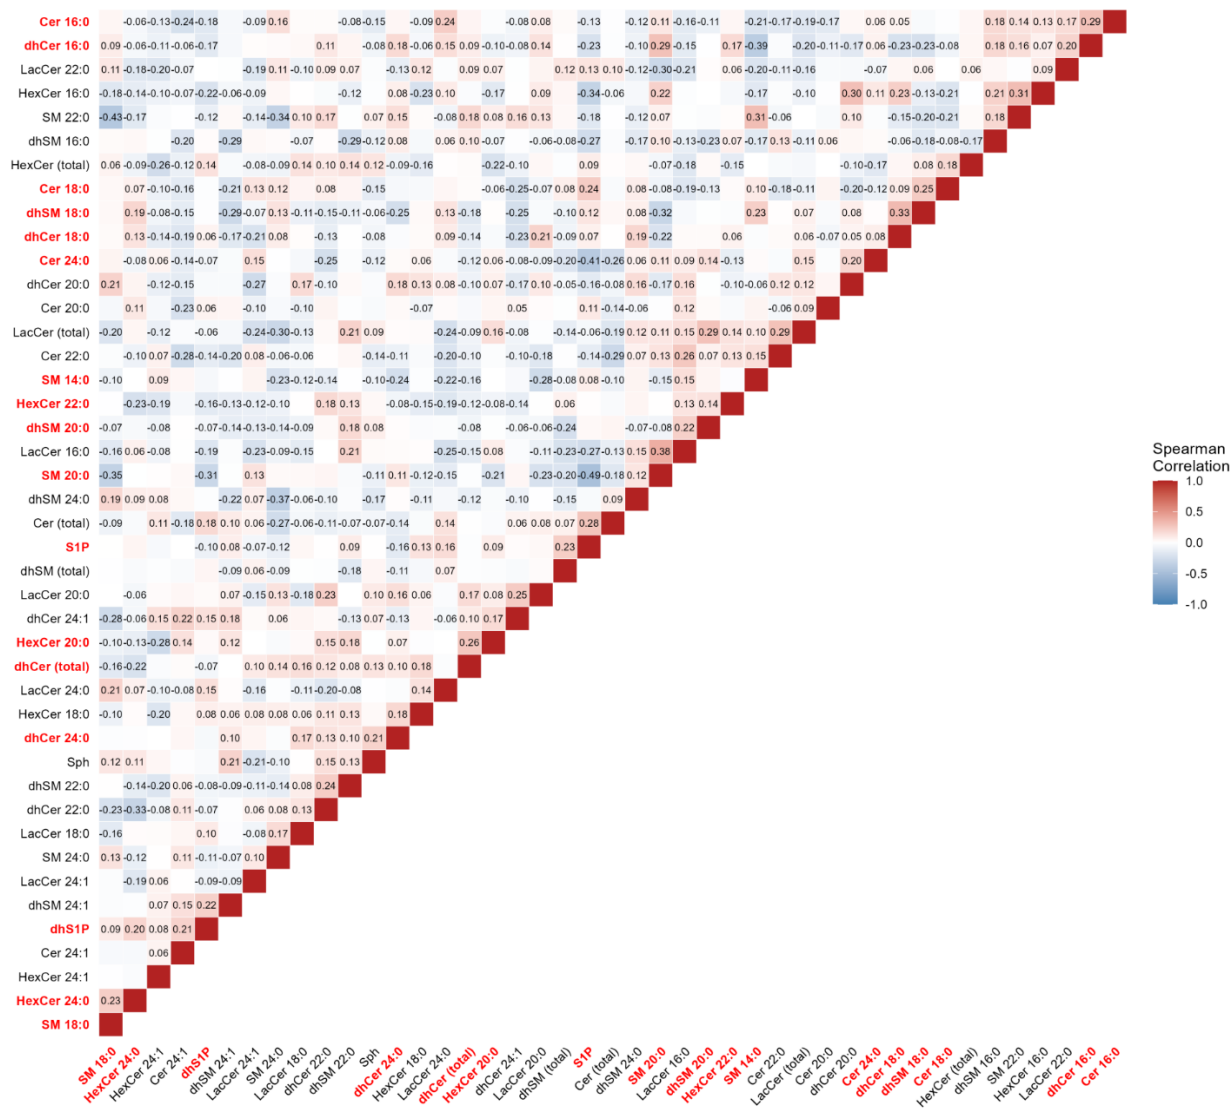

117 **Supplementary Table S7. Overview of GWAS summary statistics used for Mendelian Randomization.**

118

| Trait                                | Abbreviation | GWAS Catalogue Accession |
|--------------------------------------|--------------|--------------------------|
| LDL Cholesterol                      | LDL-C        | GCST90002412 [1]         |
| Sphingosine 1-phosphate              | S1P          | GCST90199657 [2]         |
| Sphinganine 1-phosphate              | dhS1P        | GCST90199845 [2]         |
| C14:0 Sphingomyelin (SM(d18:1/14:0)) | SM 14:0      | GCST009391 [3]           |
| C18:0 Sphingomyelin (SM(d18:1/18:0)) | SM 18:0      | GCST90134400 [4]         |
| C16:0 Ceramide (Cer(d18:1/16:0))     | Cer 16:0     | GCST90024670 [5]         |
| C18:0 Ceramide (Cer(d18:1/18:0))     | Cer 18:0     | GCST90024043 [5]         |
| C24:0 Ceramide (Cer(d18:1/24:0))     | Cer 24:0     | GCST90024046 [5]         |
| Coronary Artery Disease              | CAD          | GCST003116 [6]           |

119

120 Trait specifies the clinical phenotype or metabolite analyzed; specific lipid notations (e.g., d18:1/14:0) indicate the sphingoid  
 121 base (e.g., d18:1) and fatty acyl chain (e.g., 14:0) composition. Abbreviation denotes the short identifier used throughout the  
 122 manuscript. GWAS Catalogue Accession provides the unique study ID from the NHGRI-EBI GWAS Catalog, with the  
 123 corresponding original publication citation provided in brackets. All summary-level genetic data were obtained from studies  
 124 of European ancestry to ensure the validity of the two-sample MR design.

125

126 **Supplementary Figure S7. Mendelian Randomization scatter plot for the causal effect of Ceramide 18:0 on**  
 127 **Coronary Artery Disease (CAD).**

128 Each point represents a single genetic instrument (SNP), plotting the SNP's effect on Cer 18:0 levels (x-axis) against its effect  
 129 on CAD risk (y-axis). Error bars indicate the standard errors for each effect estimate. The colored lines show the causal  
 130 estimates derived from different MR methods. The slopes of these lines, all centered around zero, indicate a null causal effect.  
 131 The consistency across methods (Inverse Variance Weighted, MR-Egger, Weighted Median)  
 132 this null finding and suggests no significant directional pleiotropy.

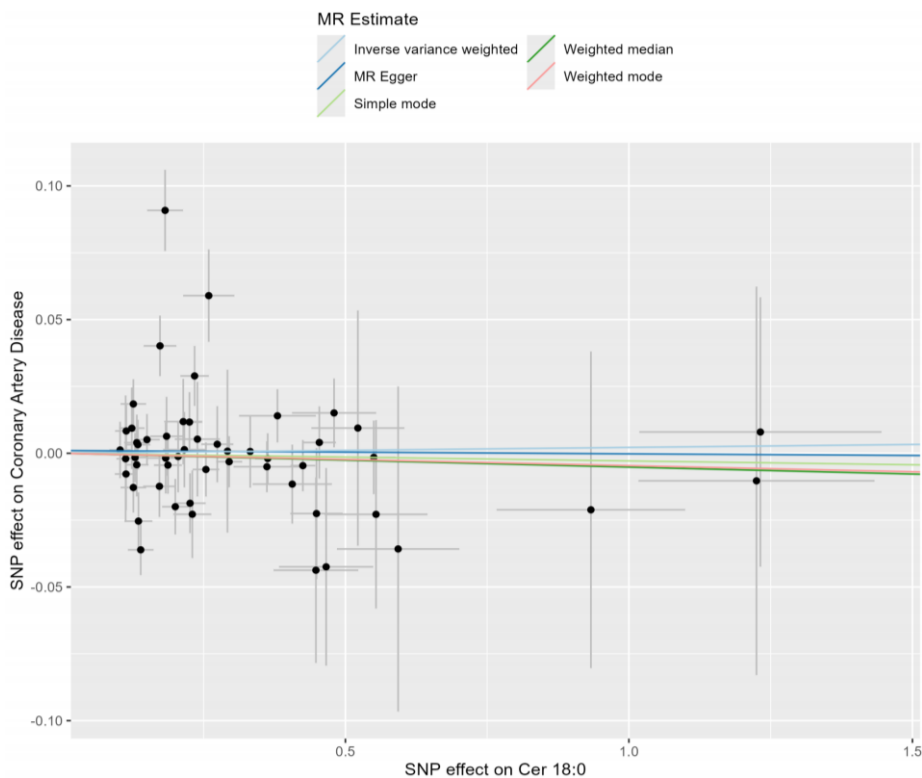

133

134 **Supplementary Figure S8. Comparison of Total Cholesterol Levels Between Study Cohorts.**

135 The figure displays the adjusted mean total cholesterol levels for each of the four study cohorts. Means were estimated from  
136 a multivariable linear model after accounting for the effects of age, sex, eGFR, diabetes and statin treatment. The points  
137 represent the estimated adjusted means, and the vertical error bars represent the respective 95% confidence intervals. The  
138 plot visually demonstrates that the total cholesterol level in the PROGRESS cohort is significantly lower than in the LIFE-Adult,  
139 LIFE-Heart-Controls, and LIFE-Heart-Cases cohorts, as indicated by the non-overlapping confidence intervals. We conclude  
140 that cholesterol is strongly down-regulated in pneumonia.

141

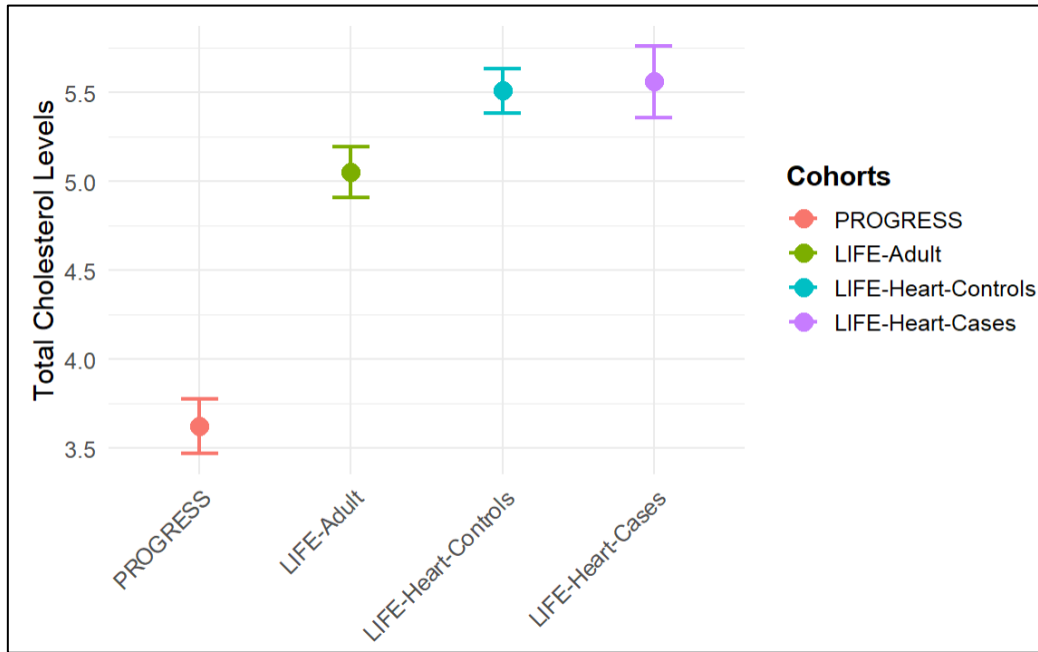

142

- [1] Y. C. Klimentidis, A. Arora, M. Newell, J. Zhou, J. M. Ordovas, B. J. Renquist and A. C. Wood, "Phenotypic and Genetic Characterization of Lower LDL Cholesterol and Increased Type 2 Diabetes Risk in the UK Biobank," *Diabetes*, vol. 69, no. 10, pp. 2194-2205, 10 2020.
- [2] Y. Chen, T. Lu, U. Pettersson-Kymmer, I. D. Stewart, G. Butler-Laporte, T. Nakanishi, A. Cerani, K. Y. H. Liang, S. Yoshiji, J. D. S. Willett, C.-Y. Su, P. Raina, C. M. T. Greenwood, Y. Farjoun, V. Forgetta, C. Langenberg, S. Zhou, C. Ohlsson and J. B. Richards, "Genomic atlas of the plasma metabolome prioritizes metabolites implicated in human diseases," *Nature Genetics*, vol. 55, no. 1, pp. 44-53, 1 2023.
- [3] E. Rhee, J. Ho, M.-H. Chen, D. Shen, S. Cheng, M. Larson, A. Ghorbani, X. Shi, I. Helenius, C. O'Donnell, A. Souza, A. Deik, K. Pierce, K. Bullock, G. Walford, R. Vasani, J. Florez, C. Clish, J.-R. Yeh, T. Wang and R. Gerszten, "A Genome-wide Association Study of the Human Metabolome in a Community-Based Cohort," *Cell Metabolism*, vol. 18, no. 1, pp. 130-143, 7 2013.
- [4] E. König, J. Rainer, V. V. Hernandez, G. Paglia, F. Del Greco M., D. Bottigliengo, X. Yin, L. S. Chan, A. Teumer, P. P. Pramstaller, A. E. Locke and C. Fuchsberger, "Whole Exome Sequencing Enhanced Imputation Identifies 85 Metabolite Associations in the Alpine CHRIS Cohort," *Metabolites*, vol. 12, no. 7, p. 604, 6 2022.
- [5] G. Cadby, C. Giles, P. E. Melton, K. Huynh, N. A. Mellett, T. Duong, A. Nguyen, M. Cinel, A. Smith, G. Olshansky, T. Wang, M. Brozynska, M. Inouye, N. S. McCarthy, A. Ariff, J. Hung, J. Hui, J. Beilby, M.-P. Dubé, G. F. Watts, S. Shah, N. R. Wray, W. L. F. Lim, P. Chatterjee, I. Martins, S. M. Laws, T. Porter, M. Vacher, A. I. Bush, C. C. Rowe, V. L. Villemagne, D. Ames, C. L. Masters, K. Taddei, M. Arnold, G. Kastenmüller, K. Nho, A. J. Saykin, X. Han, R. Kaddurah-Daouk, R. N. Martins, J. Blangero, P. J. Meikle and E. K. Moses, "Comprehensive genetic analysis of the human lipidome identifies loci associated with lipid homeostasis with links to coronary artery disease," *Nature Communications*, vol. 13, no. 1, p. 3124, 6 2022.
- [6] Nikpay M, Goel A, Won HH, Hall LM, Willenborg C, Kanoni S, Saleheen D, Kyriakou T, Nelson CP, Hopewell JC, Webb TR, Zeng L, Dehghan A and Alver M, "A comprehensive 1000 Genomes–based genome-wide association meta-analysis of coronary artery disease," *Nature Genetics*, vol. 47, no. 10, pp. 1121-1130, 10 2015.
